# Supplementary material for: The Shepherds’ Tale: A Genome-Wide Study across 9 Dog Breeds Implicates Two Loci in the Regulation of Fructosamine Serum Concentration in Belgian Shepherds
Source: PubMed Central journal article supplement (PMC4430432; doi:10.1371/journal.pone.0123173), 2015-05-13

# $F_{st}$ on CFA 5

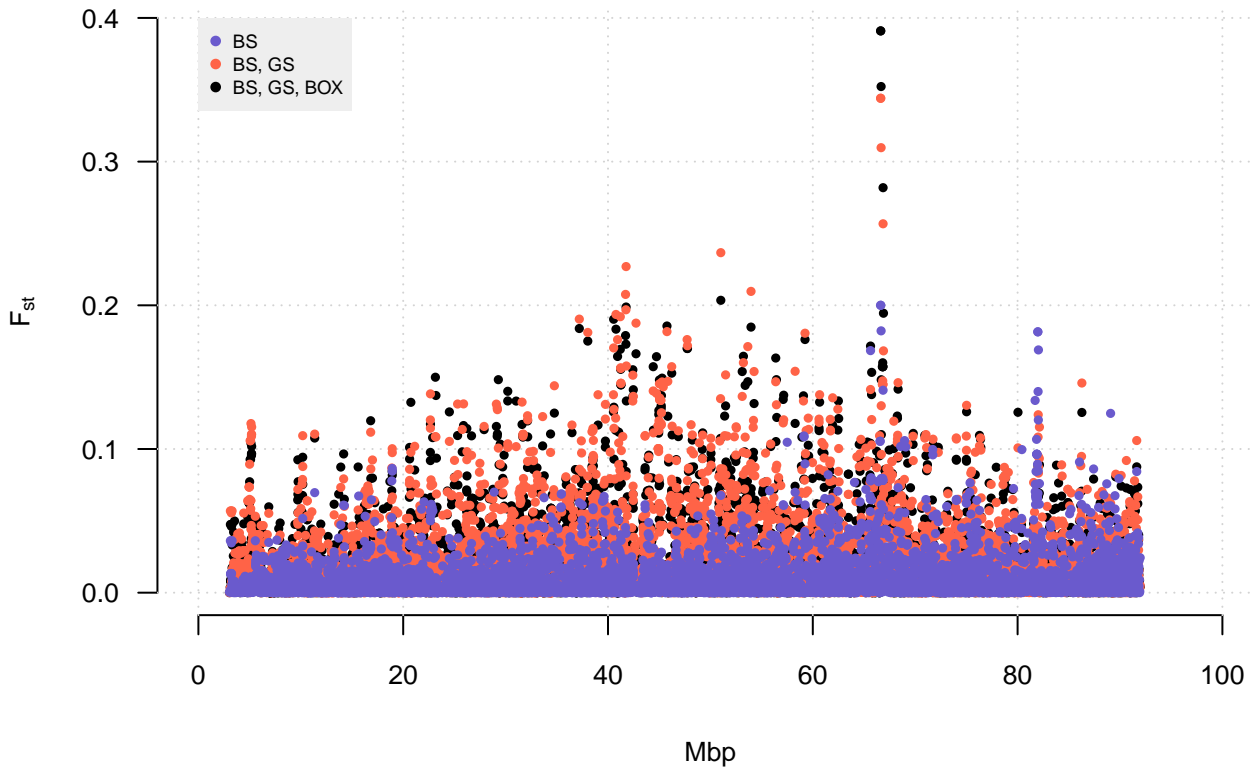

Supplement: pone.0123173.s010.pdf [file pone.0123173.s010.pdf]
